# Supplementary figures and images for: The Effect of Mat Pilates Training Combined With Aerobic Exercise Versus Mat Pilates Training Alone on Blood Pressure in Women With Hypertension: A Randomized Controlled Trial
Source: Oxford University Press journal article supplement (doi:10.1093/ptj/pzab258), 2021-11-05

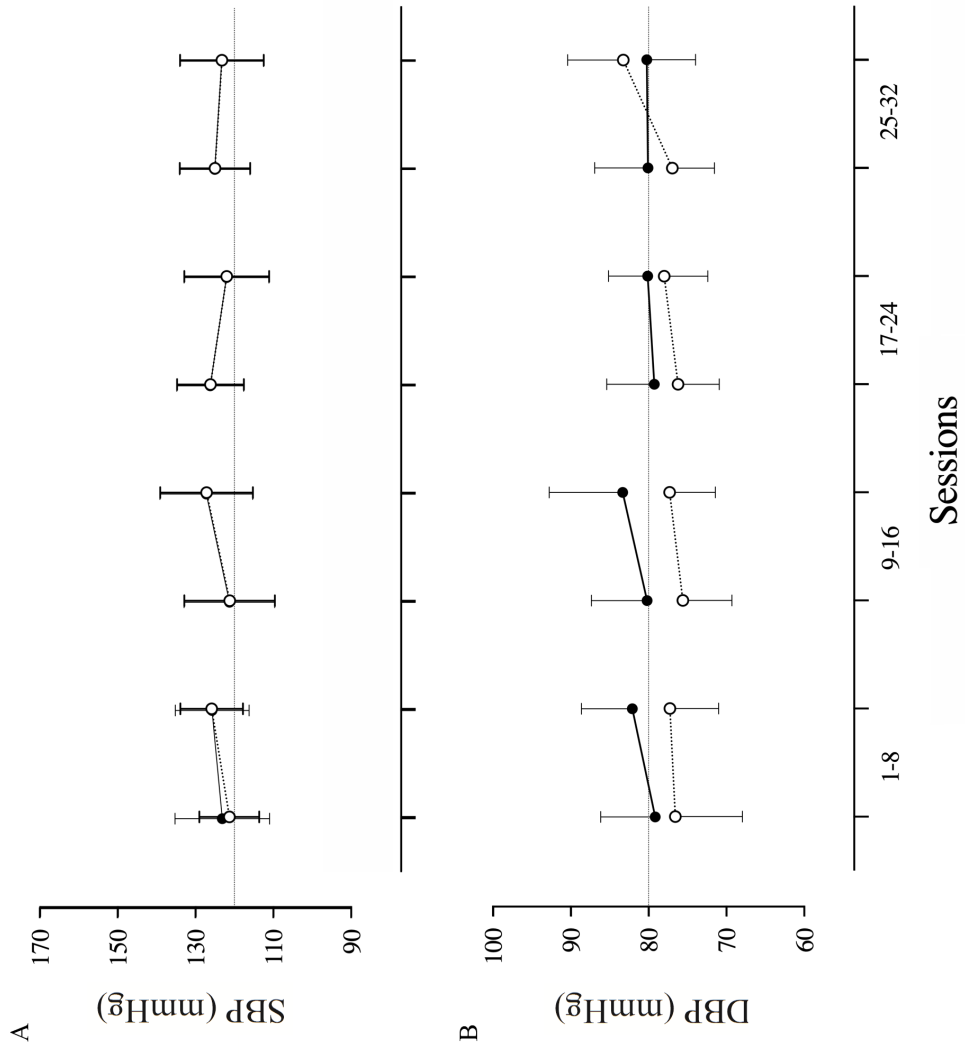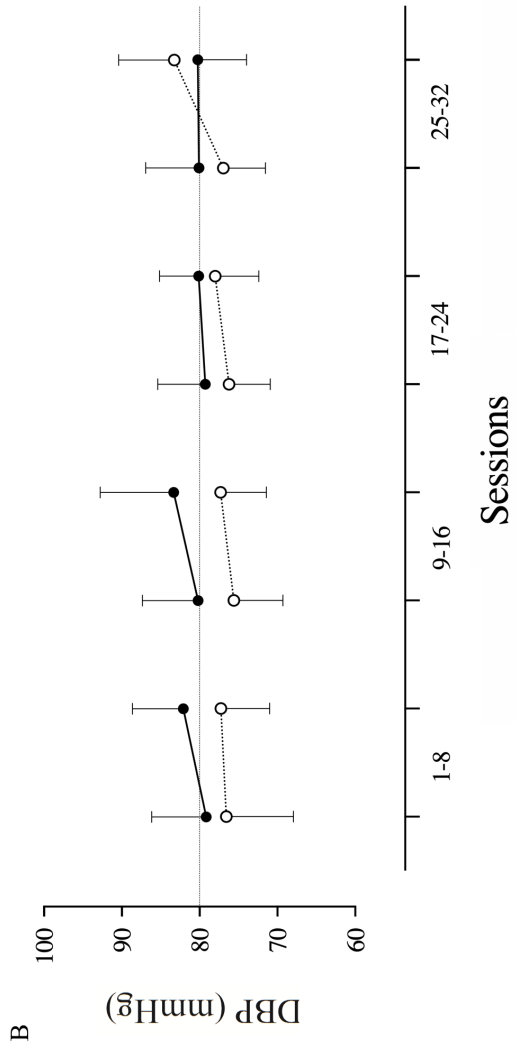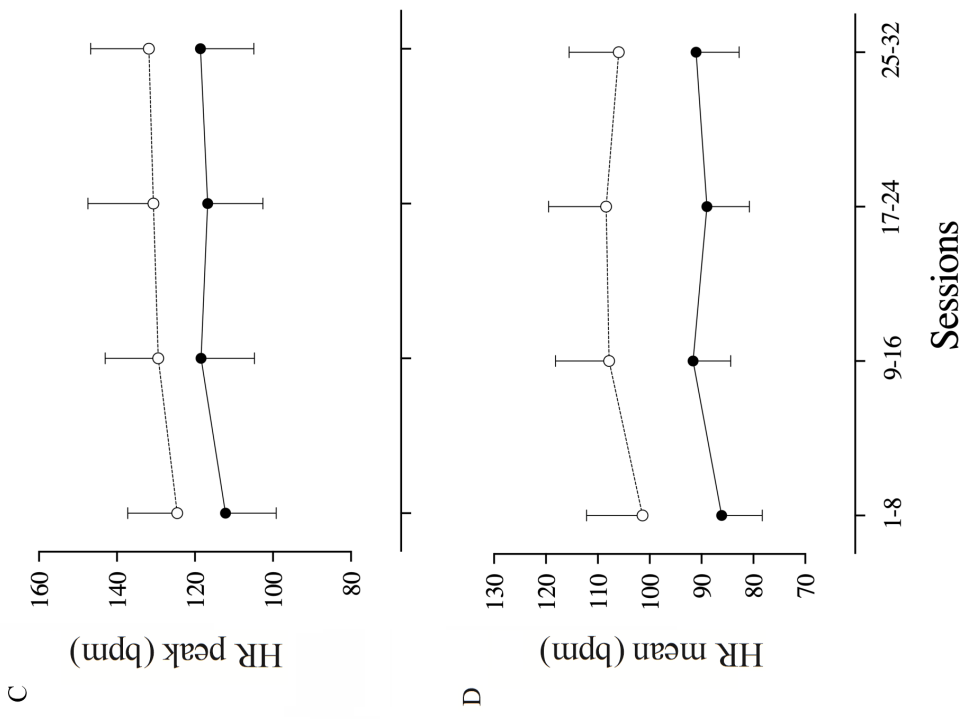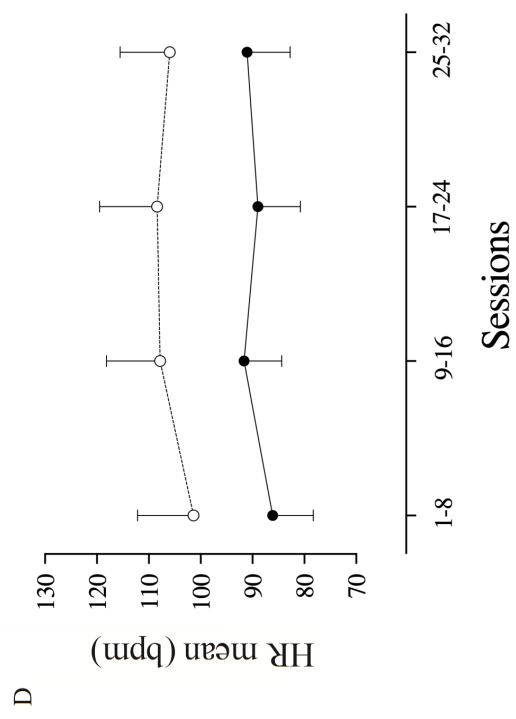

○ MP+AE  
● MP

Supplement: supplementary_figure_pzab258.pdf [file supplementary_figure_pzab258.pdf]
